# Supplementary material for: MicroRNA-665 regulates the proliferation, apoptosis and adhesion of gastric cancer cells by binding to cadherin 3
Source: PubMed Central journal article supplement — Oncol Lett. 2021 Apr 26;21(6):494. doi: 10.3892/ol.2021.12755 (PMC8100969; doi:10.3892/ol.2021.12755), 2021-04-26
Supplement: Supplementary_Data.pdf [file Supplementary_Data.pdf]

Figure S1. miR-665 and CDH3 expression following transfection. (A) CDH3 mRNA expression was identified using RT-qPCR in HGC-27 and AGS cells transfected with Si-NC, OE-NC, Si-CDH3 or OE-CDH3. \*\* $P < 0.001$  vs. Si-NC; ## $P < 0.001$  vs. OE-NC. (B) RT-qPCR was used to detect miR-665 expression in AGS HGC-27 cells transfected with mimic-NC, inhibitor-NC, miR-665 mimic and miR-665 inhibitor. \* $P < 0.05$  vs. inhibitor-NC; ## $P < 0.001$  vs. mimic-NC. Data are presented as the mean  $\pm$  SD ( $n=3$ ), and at least three independent tests were performed for every experiment. CDH3, cadherin 3; miR, microRNA; CON, blank control; NC, negative control; Si-CDH3, small interfering RNA-CDH3; OE-CDH3, overexpression-CDH3; RT-qPCR, reverse transcription-quantitative PCR.

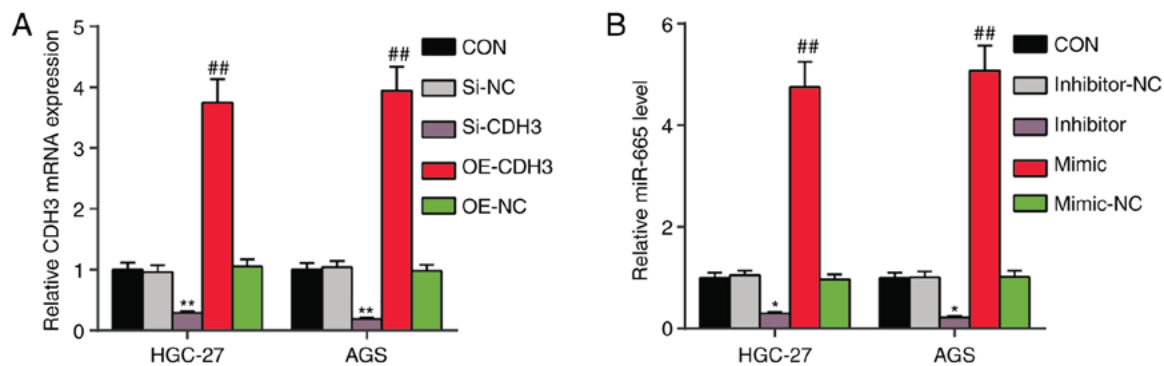

Table SI. Association between CDH3 expression and clinical characteristics in patients with gastric cancer (n=30).

| Characteristics                      | CDH3 expression, n |             | P-value |
|--------------------------------------|--------------------|-------------|---------|
|                                      | Low (n=15)         | High (n=15) |         |
| Age, years                           |                    |             | 0.710   |
| >60                                  | 10                 | 8           |         |
| ≤60                                  | 5                  | 7           |         |
| Sex                                  |                    |             | 0.715   |
| Male                                 | 7                  | 9           |         |
| Female                               | 8                  | 6           |         |
| Tumor size, cm                       |                    |             | 0.021   |
| >5                                   | 6                  | 13          |         |
| ≤5                                   | 9                  | 2           |         |
| Histological grade                   |                    |             | 0.025   |
| Low                                  | 10                 | 3           |         |
| High                                 | 5                  | 12          |         |
| TNM stage                            |                    |             | 0.010   |
| I                                    | 5                  | 0           |         |
| II                                   | 5                  | 2           |         |
| III                                  | 5                  | 9           |         |
| IV                                   | 0                  | 4           |         |
| Lymph node status                    |                    |             | 0.021   |
| Positive                             | 6                  | 13          |         |
| Negative                             | 9                  | 2           |         |
| Differentiation                      |                    |             | 0.462   |
| Poor                                 | 10                 | 7           |         |
| Well/moderate                        | 5                  | 8           |         |
| Drinking alcohol                     |                    |             | >0.999  |
| No                                   | 6                  | 5           |         |
| Yes                                  | 9                  | 10          |         |
| Smoking                              |                    |             | 0.450   |
| No                                   | 8                  | 11          |         |
| Yes                                  | 7                  | 4           |         |
| <i>Helicobacter pylori</i> infection |                    |             | 0.700   |
| Positive                             | 4                  | 6           |         |
| Negative                             | 11                 | 9           |         |

Fisher's exact test was used to determine the association between CDH3 expression and clinicopathological variables.
